# Supplementary material
Source: HighWire-hosted journal article supplement (https://bmjopen.bmj.com/content/8/2/e018909)
Supplement: inline-supplementary-material-1 [file inline-supplementary-material-1.pdf]

## Appendix A: Comparison of predictive risk models under consideration in Australia

| PRM Features                                                                                            | NSW Stage 1:<br>Ontario-HARP <sup>i</sup><br>(complex) | Commonwealth<br>Stage 1:<br>Qadmissions <sup>ii</sup> | Commonwealth Stage<br>2: Chronic Condition<br>Risk Calculator:<br>"Victoria HARP" | Consolidated List of<br>Available Predictor<br>Variables                       |
|---------------------------------------------------------------------------------------------------------|--------------------------------------------------------|-------------------------------------------------------|-----------------------------------------------------------------------------------|--------------------------------------------------------------------------------|
| <b>Design Elements</b>                                                                                  |                                                        |                                                       |                                                                                   |                                                                                |
| Required data sources                                                                                   | Hospital EHR                                           | GP practice<br>management &<br>hospital EHR           | GP practice<br>management &<br>assessment data                                    | APDC, EDDC, MBS,<br>45andUp survey,<br>mortality                               |
| Unit of Analysis                                                                                        | discharge                                              | person                                                | person                                                                            | Person                                                                         |
| Cohort definition                                                                                       | acute discharges                                       | primary care<br>population                            | primary care<br>population (for<br>Commonwealth<br>application)                   | 45and Up Survey<br>respondents<br>(with a MBS, EDDC, or<br>APDC linked record) |
| Prediction Period                                                                                       | 15 mos post-index<br>discharge                         | 2 years post index<br>time                            | 12 mos post<br>assessment                                                         | 12 mos post index<br>time                                                      |
| Prediction Outcome                                                                                      | acute presentation<br>(readmission)                    | 1+ emergency<br>admissions                            | acute presentation                                                                | 1+ acute, emergency<br>admits                                                  |
| <b>Covariates Used</b>                                                                                  |                                                        |                                                       |                                                                                   |                                                                                |
| Number and types covariates in final<br>model                                                           | 9 (complex model)                                      | 14                                                    | 21                                                                                | 26 (to test)                                                                   |
| <b>SOCIODEMOGRAPHICS</b>                                                                                |                                                        |                                                       |                                                                                   |                                                                                |
| Age                                                                                                     | ✓                                                      | ✓                                                     | x                                                                                 | ✓                                                                              |
| Gender                                                                                                  | x                                                      | ✓                                                     | x                                                                                 | ✓                                                                              |
| Income/Income Decile                                                                                    | x                                                      | x                                                     | ✓                                                                                 | ✓                                                                              |
| Index of relative SES disadvantage                                                                      | x                                                      | ✓                                                     | x                                                                                 | ✓                                                                              |
| Remoteness/Rurality                                                                                     | x                                                      | ✓ (n=10 regions)                                      | x                                                                                 | ✓                                                                              |
| Ancestry/Race/Ethnicity                                                                                 | x                                                      | ✓                                                     | x                                                                                 | ✓                                                                              |
| Aboriginal/Torres Strait Islander                                                                       | x                                                      | x                                                     | ✓                                                                                 | ✓                                                                              |
| Language other than English                                                                             | x                                                      | x                                                     | ✓                                                                                 | ✓                                                                              |
| Transportation                                                                                          | x                                                      | x                                                     | ✓                                                                                 | x                                                                              |
| Housing stability                                                                                       | x                                                      | x                                                     | ✓                                                                                 | x                                                                              |
| Asthma triggers                                                                                         | x                                                      | x                                                     | ✓                                                                                 | x                                                                              |
| <b>SOCIAL SUPPORT</b>                                                                                   |                                                        |                                                       |                                                                                   |                                                                                |
| Marital status                                                                                          | x                                                      | x                                                     | x                                                                                 | ✓                                                                              |
| Caregiver / Other Social Support                                                                        | x                                                      | x                                                     | ✓                                                                                 | ✓                                                                              |
| <b>HEALTH STATUS</b>                                                                                    |                                                        |                                                       |                                                                                   |                                                                                |
| Comorbidity Score/Count                                                                                 | ✓                                                      | x                                                     | x                                                                                 | ✓                                                                              |
| Specific conditions (DX)                                                                                | ✓ (n=19)                                               | ✓ (n=12)                                              | ✓ (n=7)                                                                           | ✓ (tested, not used)                                                           |
| Illness Severity/Resources Intensity                                                                    | ✓                                                      | x                                                     | x                                                                                 | x                                                                              |
| Specific medications/<br>polypharmacy/regimen changes                                                   | x                                                      | ✓ (n=5)                                               | ✓ (n=2)                                                                           | ✓                                                                              |
| Clinical indicators (lab values, PX, etc.)                                                              | x                                                      | ✓ (n=3)                                               | ✓                                                                                 | x                                                                              |
| Mental illness                                                                                          | x                                                      | ✓                                                     | ✓                                                                                 | ✓                                                                              |
| Drug use/abuse                                                                                          | x                                                      | x                                                     | ✓                                                                                 | x                                                                              |
| <b>HEALTH-RELATED BEHAVIORS</b>                                                                         |                                                        |                                                       |                                                                                   |                                                                                |
| BMI                                                                                                     | x                                                      | ✓                                                     | ✓                                                                                 | ✓                                                                              |
| Smoking status                                                                                          | x                                                      | ✓                                                     | ✓                                                                                 | ✓                                                                              |
| Alcohol use                                                                                             | x                                                      | ✓                                                     | ✓                                                                                 | ✓                                                                              |
| Physical Activity                                                                                       | x                                                      | x                                                     | ✓                                                                                 | ✓ (tested, not used)                                                           |
| Readiness to Change                                                                                     | x                                                      | x                                                     | ✓ (n=7)                                                                           | x                                                                              |
| <b>FUNCTIONAL STATUS</b>                                                                                |                                                        |                                                       |                                                                                   |                                                                                |
| Self-reported health status                                                                             | x                                                      | x                                                     | x                                                                                 | ✓                                                                              |
| Health-Related Quality of Life (functional<br>status, disability, self-care)                            | x                                                      | x                                                     | ✓                                                                                 | ✓                                                                              |
| Other measures of functional status<br>(mobility, fall history, pain, cognitive<br>impairment, frailty) | x                                                      | ✓ (falls)                                             | ✓ (dementia,<br>pain, falls,<br>incontinence)                                     | ✓ (falls)                                                                      |

| PRIOR HOSPITAL/ED UTILIZATION |   |   |   |   |
|-------------------------------|---|---|---|---|
| Index Admit LOS               | ✓ | x | x | ✓ |
| Discharge disposition         | ✓ | x | x | x |
| Previous hospitalizations     | ✓ | ✓ | ✓ | ✓ |
| Admit via ED                  | ✓ | x | x | ✓ |
| Previous ED use               | ✓ | x | x | ✓ |
| ACCESSIBILITY                 |   |   |   |   |
| GP care                       | x | x | ✓ | ✓ |

---

<sup>i</sup> Canadian Institute for Health Information. Early Identification of People At-Risk of Hospitalization: Hospital Admission Risk Prediction (HARP) – a new tool for supporting providers and patients. Technical Appendix. Queen's Printer for Ontario: 2013. [https://secure.cihi.ca/free\\_products/HARP\\_reportv\\_En.pdf](https://secure.cihi.ca/free_products/HARP_reportv_En.pdf) (retrieved 05/03/17)

<sup>ii</sup> Hippisley-Cox J, Coupland C. Predicting risk of emergency admission to hospital using primary care data: derivation and validation of QAdmissions score. *BMJ Open*. 2013;3:e003482.
